# Supplementary material for: Targeting IFN-γ-inducible lysosomal thiol reductase overcomes chemoresistance in AML through regulating the ROS-mediated mitochondrial damage
Source: PubMed Central journal article supplement — Transl Oncol. 2021 Jul 9;14(9):101159. doi: 10.1016/j.tranon.2021.101159 (PMC8319687; doi:10.1016/j.tranon.2021.101159), 2021-07-09

# 细胞 STR 检测报告

## 一、检测样品

样品名称：THP-1

样品编号：BNCC 341989

## 二、检测项目：STR 基因型检验

三、检测方法：用 Axygen 的基因组抽提试剂盒提取 DNA，采用 21-STR 扩增方案扩增，在 ABI 3730XL 型遗传分析仪上对 STR 位点和性别基因 Amelogenin 进行检测。

## 四、检验结果：

### 1, 检验基本情况

| 编号     | 多等位基因 | 匹配细胞系 | 细胞库  | EV 值 | 匹配说明 |
|--------|-------|-------|------|------|------|
| 341989 | 无     | THP-1 | DSMZ | 1.00 | 完全匹配 |

多等位基因指三等位及以上基因现象。

本次检测各细胞分型结果良好。

### 2, 样本描述

BNCC 341989：该株细胞 DNA 分型在细胞系检索中找到完全匹配的细胞系，DSMZ 数据库显示细胞名为 THP-1 细胞号对应 310。本次检测在该细胞系中没有发现多等位基因。

**备注：**待测细胞系与收录于 ATCC, DSMZ, JCRB 和 RIKEN 数据库的细胞系 STR 数据进行比对，未收录于以上细胞库的细胞系将无法匹配。

附表：THP-1 细胞的 STR 位点和 Amelogenin 位点的基因分型结果

| THP-1 细胞 |          |          |          |
|----------|----------|----------|----------|
| Marker   | Allele 1 | Allele 2 | Allele 3 |
| D5S818   | 11       | 12       |          |
| D13S317  | 13       | 13       |          |
| D7S820   | 10       | 10       |          |
| D16S539  | 11       | 12       |          |
| VWA      | 16       | 16       |          |
| TH01     | 8        | 9.3      |          |
| AMEL     | X        | Y        |          |
| TPOX     | 8        | 11       |          |
| CSF1PO   | 11       | 13       |          |
| D12S391  | 19       | 19       |          |
| FGA      | 24       | 25       |          |
| D2S1338  | 17       | 18       |          |
| D21S11   | 30       | 31.2     |          |
| D18S51   | 13       | 14       |          |
| D8S1179  | 10       | 14       |          |
| D3S1358  | 15       | 17       |          |

附图：DSMZ 数据库比对结果

| Result of STR matching analysis by your data.                 |            |             |             |         |        |         |       |       |     |      |        |         |
|---------------------------------------------------------------|------------|-------------|-------------|---------|--------|---------|-------|-------|-----|------|--------|---------|
| - DSMZ Profile Database -                                     |            |             |             |         |        |         |       |       |     |      |        |         |
| A graphical presentation is shown at the bottom of this page. |            |             |             |         |        |         |       |       |     |      |        |         |
| EV                                                            | Cell No.   | Cell name   | Locus names |         |        |         |       |       |     |      |        | Figures |
|                                                               |            |             | D5S818      | D13S317 | D7S820 | D16S539 | VWA   | TH01  | AM  | TPOX | CSF1PO |         |
| Query (Your Cell)                                             |            |             | 11,12       | 13,13   | 10,10  | 11,12   | 16,16 | 8,9,3 | X,Y | 8,11 | 11,13  |         |
| 1.00(36/36)                                                   | TIB-202    | THP-1       | 11,12       | 13,13   | 10,10  | 11,12   | 16,16 | 8,9,3 | X,Y | 8,11 | 11,13  | -       |
| 0.94(34/36)                                                   | JCRB0112.1 | THP-1       | 11,12       | 13,13   | 10,10  | 11,12   | 16,16 | 8,10  | X,Y | 8,11 | 11,13  | -       |
| 0.89(32/36)                                                   | 16         | THP-1       | 11,12       | 8,13    | 10,10  | 11,12   | 16,17 | 8,9,3 | X,Y | 8,11 | 11,13  | -       |
| 0.89(32/36)                                                   | RCB1189    | THP-1       | 11,12       | 8,13    | 10,10  | 11,12   | 16,17 | 8,9,3 | X,Y | 8,11 | 11,13  | -       |
| 0.89(32/36)                                                   | RCB2128    | A-THP-1     | 11,12       | 8,13    | 10,10  | 11,12   | 16,17 | 8,9,3 | X,Y | 8,11 | 11,13  | -       |
| 0.72(26/36)                                                   | CRL-4031   | RPTEC/TERT1 | 9,11        | 11,13   | 10,10  | 11,12   | 16,18 | 9,9,3 | X,Y | 8,11 | 11,11  | -       |
| 0.72(26/36)                                                   | CRL-7378   | Hs 616.T    | 11,11       | 11,13   | 10,10  | 12,13   | 16,16 | 8,9,3 | X,Y | 8,11 | 12,12  | -       |

其他说明

分型方案及位点分布

|   | 方案 1    | 方案 2    | 方案 3    | 方案 4    |
|---|---------|---------|---------|---------|
| 1 | D3S1358 | D8S1179 | D19S433 | AMEL    |
| 2 | VWA     | D21S11  | TH01    | D1S1656 |
| 3 | D7S820  | D16S539 | D13S317 | D5S818  |
| 4 | CSF1PO  | D2S1338 | TPOX    | D12S391 |
| 5 | PENTAE  | PENTAD  | D18S51  | FGA     |
| 6 |         |         | D6S1043 |         |

签发日期：2019. 4. 10

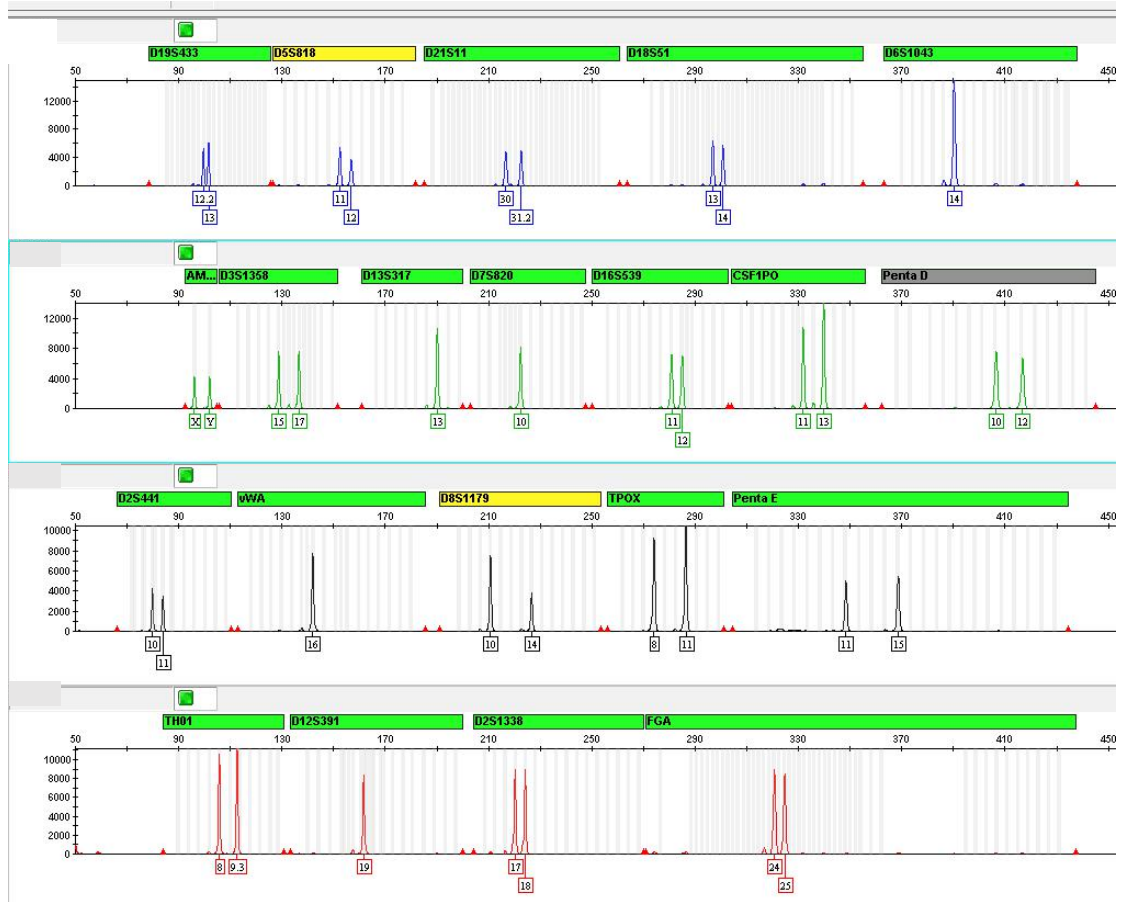

Supplement: mmc5.pdf [file mmc5.pdf]
