# Supplementary material for: Targeting IFN-γ-inducible lysosomal thiol reductase overcomes chemoresistance in AML through regulating the ROS-mediated mitochondrial damage
Source: PubMed Central journal article supplement — Transl Oncol. 2021 Jul 9;14(9):101159. doi: 10.1016/j.tranon.2021.101159 (PMC8319687; doi:10.1016/j.tranon.2021.101159), 2021-07-09
Supplement: mmc1.pdf [file mmc1.pdf]

# **Cell Line Authentication Report**

Institution : KeyGen BioTech

Tel: 025-84989809

## 1. Sample information:

Cell pellets, No.: "Kasumi-1"

## 2. Methods:

- a. Genomic DNA was extracted from the cell pellets provided by the customer.
- b. Samples, together with positive and negative control were amplified using GenePrint 10 System (Promega).
- c. Amplified products were processed using the ABI3500 Genetic Analyzer.
- d. Data were analyzed using GeneMapper4.0 software and then compared with the ATCC, DSMZ or JCRB databases for reference matching.

## 3. Results:

STR profile

| Marker  | Allele1 | Allele 2 |
|---------|---------|----------|
| D3S1358 | 15      | 17       |
| TH01    | 6       | 9        |
| D21S11  | 30      | 31       |
| D18S51  | 15      | 16       |
| Penta E | 11      |          |
| D5S818  | 9       | 11       |
| D13S317 | 11      | 13       |
| D7S820  | 8       | 11       |
| D16S539 | 9       | 12       |
| CSF1PO  | 10      | 12       |
| Penta D | 12      |          |
| AMEL    | X       |          |
| vWA     | 14      |          |
| D8S1179 | 13      | 14       |
| TPOX    | 8       | 9        |

|         |    |      |
|---------|----|------|
| FGA     | 22 | 24   |
| D19S433 | 13 | 15.2 |
| D2S1338 | 19 |      |

#### **4. Conclusion**

- A. The STR results showed that there were no four alleles in each locus, and no cross contamination of human cells was found in the cell line.
- B. The percent match between the sample and the ATCC database profile is 100%, the cell name is Kasumi-1.

Operator : JY
