# Supplementary material for: Targeting IFN-γ-inducible lysosomal thiol reductase overcomes chemoresistance in AML through regulating the ROS-mediated mitochondrial damage
Source: PubMed Central journal article supplement — Transl Oncol. 2021 Jul 9;14(9):101159. doi: 10.1016/j.tranon.2021.101159 (PMC8319687; doi:10.1016/j.tranon.2021.101159), 2021-07-09
Supplement: mmc3.pdf [file mmc3.pdf]

# **Cell Line Authentication Report**

Institution : KeyGen BioTech

Tel : 025-84989809

## 1. Sample information:

Cell pellets, No.: "MV4-11"

## 2. Methods:

- a. Genomic DNA was extracted from the cell pellets provided by the customer.
- b. Samples, together with positive and negative control were amplified using GenePrint 10 System (Promega).
- c. Amplified products were processed using the ABI3500 Genetic Analyzer.
- d. Data were analyzed using GeneMapper4.0 software and then compared with the ATCC, DSMZ or JCRB databases for reference matching.

## 3. Results:

STR profile

| Marker  | Allele1 | Allele 2 |
|---------|---------|----------|
| D5S818  | 11      | 12       |
| D13S317 | 13      | 13       |
| D7S820  | 8       | 9        |
| D16S539 | 11      | 12       |
| vWA     | 14      | 15       |
| TH01    | 8       | 9.3      |
| AMEL    | X       | Y        |
| TPOX    | 8       | 11       |
| CSF1PO  | 10      | 12       |
| D12S391 | 21      | 23       |
| FGA     | 19      | 21       |
| D2S1338 | 24      | 25       |
| D21S11  | 32      | 32.2     |
| D18S51  | 11      | 17       |
| D8S1179 | 13      | 13       |

|         |    |      |
|---------|----|------|
| D3S1358 | 16 | 17   |
| D6S1043 | 12 | 20   |
| PENTAE  | 7  | 18   |
| D19S433 | 15 | 15   |
| PENTAD  | 9  | 10   |
| D1S1656 | 13 | 15.3 |

#### 4. Conclusion

A. The STR results showed that there were no four alleles in each locus, and no cross contamination of human cells was found in the cell line.

B. The percent match between the sample and the DSMZ database profile is 100%, the cell name is MV4-11.

Operator: Yu Ji
