# Supplementary material for: Targeting IFN-γ-inducible lysosomal thiol reductase overcomes chemoresistance in AML through regulating the ROS-mediated mitochondrial damage
Source: PubMed Central journal article supplement — Transl Oncol. 2021 Jul 9;14(9):101159. doi: 10.1016/j.tranon.2021.101159 (PMC8319687; doi:10.1016/j.tranon.2021.101159), 2021-07-09
Supplement: mmc6.pdf [file mmc6.pdf]

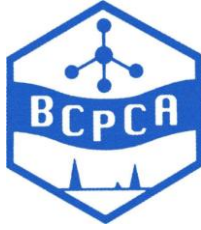

Beijing Center for Physical and Chemical Analysis

## Test Report

Sample ID: 210531-YFS-001-02

Customer: Peking University People's Hospital

Sample Name: U-937

Sample Type: Cell suspension

Date of Reception: May 31, 2021

Date of Completion: June 2, 2021

Test Content: Cell identification

Checked by:

Approved for Issue:

Notification :

1. The present test report is invalid without the match mark of the special test report stamp and Beijing Center for Physical and Chemical Analysis (BCPCA) responsible signature.
2. The customer, in case of any questions, should provide a written demand to BCPCA within 15 days following the reception of the report.
3. The unrepeatable test will not be reproduced.
4. The present test report issued only concerned the testing samples.
5. This test report cannot be partially reproduced without prior written permission of BCPCA.

Tel: (86-10) 58711817 Fax: (86-10) 58717638

E-mail: test@beijinglab.com.cn

Website: <http://www.beijinglab.com.cn>

Address (Postcode): No. 7 Fengxian Middle Road, Haidian District, Beijing (100094)

---

## Test Result

| Sample ID         | Standard (method) of testing                                                                         | Reference cell line | STR profile database | EV Value | Test Results |
|-------------------|------------------------------------------------------------------------------------------------------|---------------------|----------------------|----------|--------------|
| 210531-YFS-001-02 | Designation: ASN-0002,<br>Authentication of Human<br>Cell Lines: Standardization<br>of STR Profiling | U-937 cell<br>line  | DSMZ                 | 0.94     | Match        |

(The following is blank)

**Supplementary Materials****Table S1. Autosomal STR typing results of 210531-YFS-001-02**

| <b>Marker</b> | <b>Allele1</b> | <b>Allele2</b> |
|---------------|----------------|----------------|
| D3S1358       | 16             | 16             |
| D5S818        | 12             | 12             |
| D2S1338       | 17             | 20             |
| TPOX          | 8              | 11             |
| CSF1PO        | 12             | 12             |
| Penta D       | 12             | 13             |
| Indel         |                |                |
| Amel          | X              | X              |
| TH01          | 6              | 9.3            |
| vWA           | 14             | 15             |
| D7S820        | 11             | 11             |
| D21S11        | 27             | 29             |
| Penta E       | 13             | 13             |
| D10S1248      | 14             | 14             |
| D8S1179       | 12             | 13             |
| D1S1656       | 17.3           | 17.3           |
| D18S51        | 13             | 14             |
| D12S391       | 17             | 18             |
| D6S1043       | 12             | 18             |
| D19S433       | 14             | 16             |
| D16S539       | 12             | 12             |
| D13S317       | 10             | 12             |
| FGA           | 22             | 25             |

**Result of STR matching analysis by your data.**

- DSMZ Profile Database -

A graphical presentation is shown at the bottom of this page.

| EV          | Cell No.   | Cell name                | Locus names  |              |              |              |              |              |            |             |              | Figures |
|-------------|------------|--------------------------|--------------|--------------|--------------|--------------|--------------|--------------|------------|-------------|--------------|---------|
|             |            |                          | D5S818       | D13S317      | D7S820       | D16S539      | VWA          | TH01         | AM         | TPOX        | CSF1PO       |         |
|             |            | <i>Query (Your Cell)</i> | <i>12,12</i> | <i>10,12</i> | <i>11,11</i> | <i>12,12</i> | <i>14,15</i> | <i>6,9,3</i> | <i>x,x</i> | <i>8,11</i> | <i>12,12</i> |         |
| 0.94(34/36) | 155        | JOSK-1                   | 12,12        | 10,12        | 9,11         | 12,12        | 14,15        | 6,9,3        | X,X        | 8,11        | 12,12        | -       |
| 0.94(34/36) | CRL-2776   | SAML-1                   | 12,12        | 10,12        | 9,11         | 12,12        | 14,15        | 6,9,3        | X,X        | 8,11        | 12,12        | -       |
| 0.94(34/36) | IFO50038   | U-937                    | 12,12        | 10,12        | 9,11         | 12,12        | 14,15        | 6,9,3        | X,X        | 8,11        | 12,12        | -       |
| 0.94(34/36) | JCRB0116.1 | U937 cl1-14              | 12,12        | 10,12        | 9,11         | 12,12        | 14,15        | 6,9,3        | X,X        | 8,11        | 12,12        | -       |
| 0.94(34/36) | JCRB0116.2 | U937 d 1-22              | 12,12        | 10,12        | 9,11         | 12,12        | 14,15        | 6,9,3        | X,X        | 8,11        | 12,12        | -       |
| 0.94(34/36) | RCB1978    | U937                     | 12,12        | 10,12        | 9,11         | 12,12        | 14,15        | 6,9,3        | X,X        | 8,11        | 12,12        | -       |
| 0.89(32/36) | CRL-2367   | TUR                      | 12,12        | 10,12        | 9,11         | 12,12        | 14,16        | 6,9,3        | X,X        | 8,11        | 12,12        | -       |
| 0.89(32/36) | JCRB9021   | U937                     | 12,12        | 10,12        | 9,11         | 12,12        | 14,15        | 6,10         | X,X        | 8,11        | 12,12        | -       |
| 0.89(32/36) | RCB0435    | U-937 DE-4               | 12,12        | 10,12        | 9,11         | 12,12        | 15,15        | 6,9,3        | X,X        | 8,11        | 12,12        | -       |
| 0.83(30/36) | 30         | JOSK-M                   | 13,13        | 10,12        | 9,11         | 12,12        | 14,15        | 6,9,3        | X,X        | 8,11        | 12,12        | -       |
| 0.83(30/36) | CRL-1593.2 | U-937                    | 12,12        | 10,12        | 9,11         | 12,12        | 15,15        | 9,3,9,3      | X,X        | 8,11        | 12,12        | -       |
| 0.81(30/37) | 5          | U-937                    | 10,12,13     | 10,12        | 9,11         | 12,12        | 14,15        | 6,9,3        | X,X        | 8,11        | 10,12        | -       |

**Figure S1. DSMZ database comparison results of 210531-YFS-001-02**
